# Supplementary material for: Plasmonic nanoscale temperature shaping on a single titanium nitride nanostructure
Source: Royal Society of Chemistry journal article supplement (doi:10.1039/d2nr02442j), 2022-01-01
Supplement: d2nr02442j1.pdf [file d2nr02442j1.pdf]

## Electronic Supplementary Information for

### Plasmonic Nanoscale Temperature Shaping on a Single Titanium Nitride Nanostructure

Mamoru Tamura,<sup>a,b</sup> Takuya Iida<sup>a,c</sup> and Kenji Setoura<sup>\*d</sup>

a. Research Institute for Light-induced Acceleration System (RILACS), Osaka Metropolitan University, Sakai, Osaka 599-8570, Japan

b. Division of Materials Physics, Graduate School of Engineering Science, Osaka University, Toyonaka, Osaka, 560-8531, Japan

c. Department of Physics, Osaka Metropolitan University, Sakai, Osaka 599-8531, Japan

d. Department of Mechanical Engineering, Kobe City College of Technology, Kobe, Hyogo 651-2194, Japan.

E-mail: setoura@kobe-kosen.ac.jp

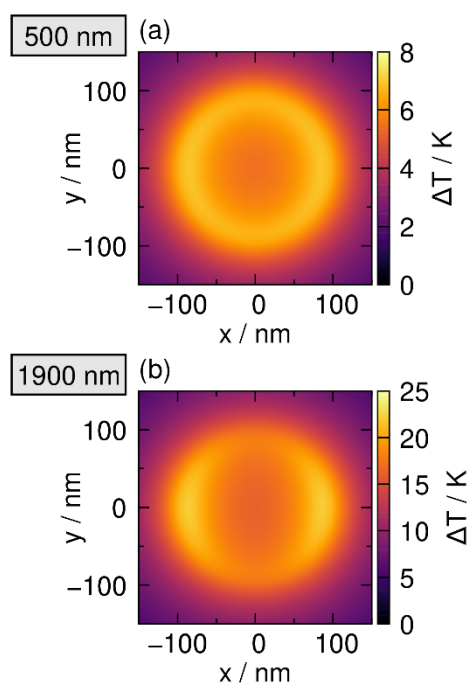

Figure S1. Temperature distributions around an Au nanoring under illumination at a wavelength of 500 nm (a) and 1900 nm (b). The numerical simulations were performed in the same manner as shown Fig. 3c and -f; only the thermal conductivity of the nanoring was replaced from TiN to gold.

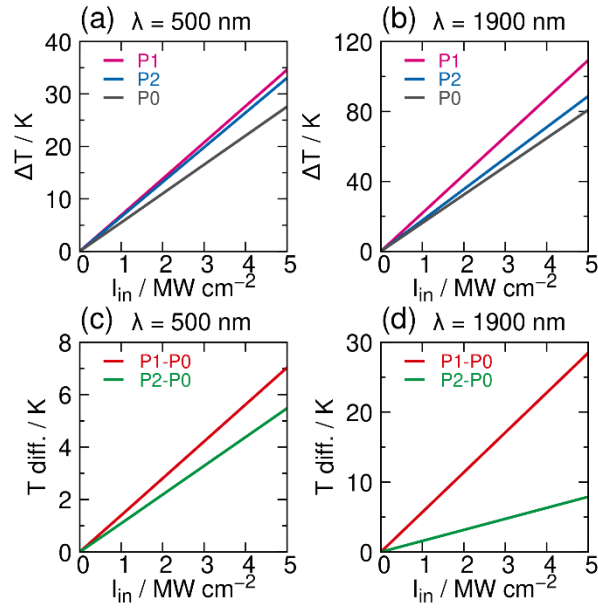

Fig S2. Temperature increase at specific locations around the Au nanoring as a function of light intensity. The numerical simulations were performed in the same manner as shown Fig. 4; only the thermal conductivity of nanoring was replaced from TiN to gold. (a)(b) Temperature increase  $\Delta T(\mathbf{r}) = T(\mathbf{r}) - T_{\text{amb}}$  at the location  $\mathbf{r} = \text{P0, P1, and P2}$ . (c)(d) Temperature difference from  $T(\mathbf{r} = \text{P0})$  to  $T(\mathbf{r} = \text{P1})$  and  $T(\mathbf{r} = \text{P2})$ . Excitation wavelengths were (a)(c) 500 nm and (c)(d) 1900 nm, respectively.

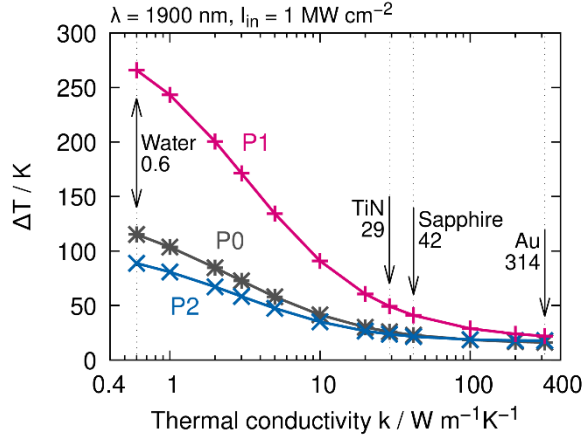

Fig S3. Temperature increase  $\Delta T$  at P1, P2, and P0 in Fig. 4 as a function of the thermal conductivity  $k$  of nanoring. The dashed lines indicated the thermal conductivity [ $W \text{ m}^{-1}K^{-1}$ ] of materials employed in this study. The  $k$  was swept from  $0.6 \text{ W m}^{-1}K^{-1}$  to  $314 \text{ W m}^{-1}K^{-1}$ ; the results at  $k = 29$  and  $314 \text{ W m}^{-1}K^{-1}$  were corresponding to Fig. 4 and Fig. S2, respectively.
